# Supplementary material for: SMAD4 Feedback Activates the Canonical TGF-β Family Signaling Pathways
Source: MDPI journal article supplement (doi:10.3390/ijms221810024), 2021-09-16
Supplement: s1 [file s1]

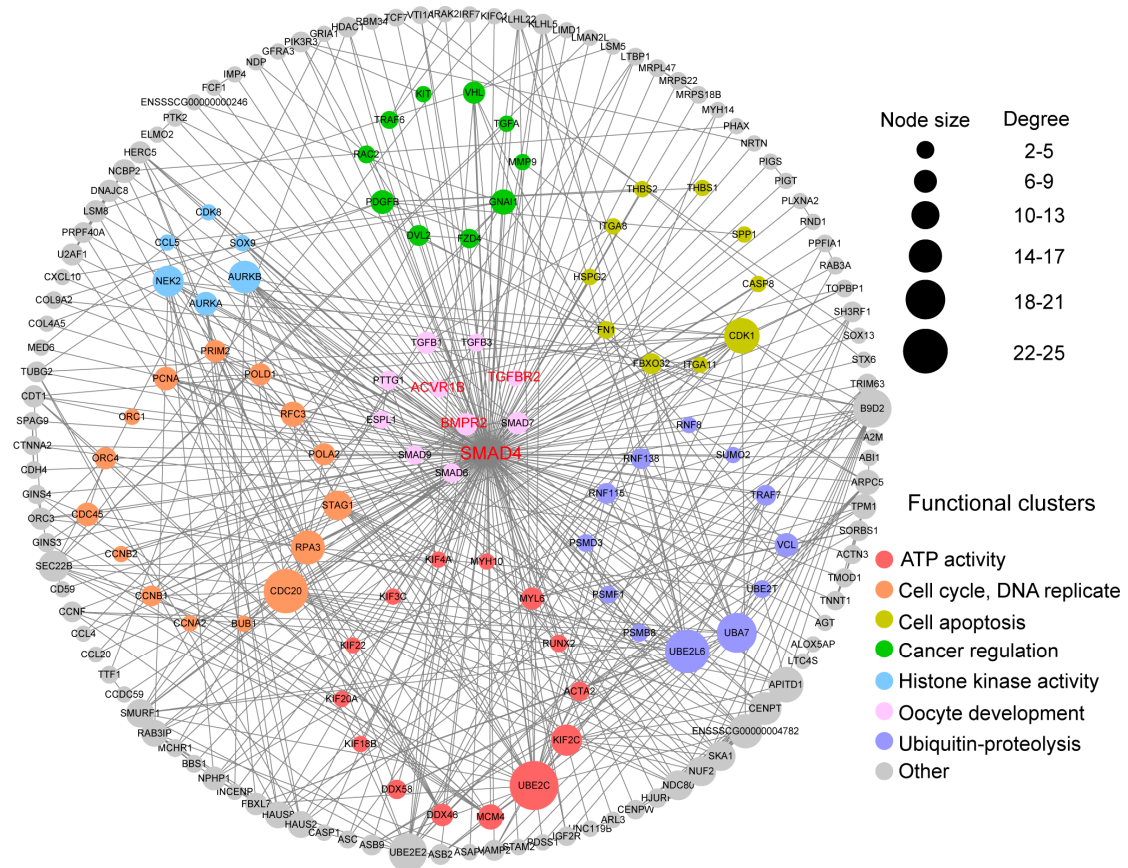

**Figure S1.** SMAD4-mediated gene-function interaction network. SMAD4-mediated DEmRNA-function interaction network was obtained by STRING database with the information of known connection data and visualized by Cytoscape 3.7.1. DEmRNAs are indicated as nodes, and their interactions are shown as edges. Nodes are grouped based on their known biological functions and their size reflects the interaction degree as indicated.

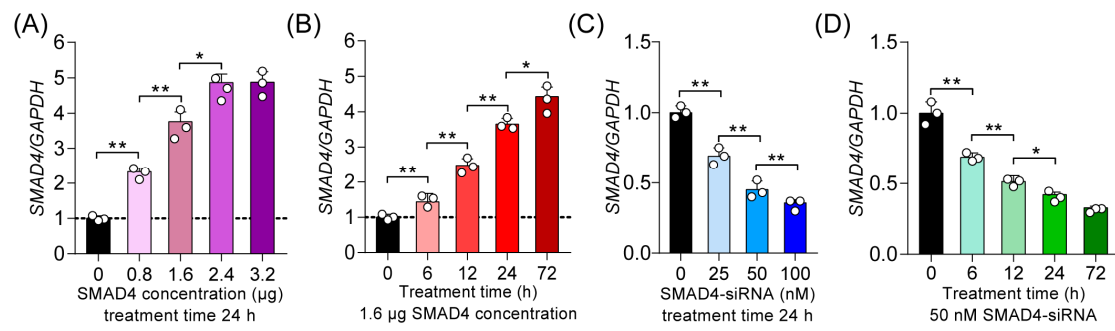

**Figure S2.** SMAD4 expression efficiency detection. **(A-D)** The mRNA levels of SMAD4 in porcine GCs treated as indicated were measured by qRT-PCR ( $n=3$ ). Data were shown as mean  $\pm$  S.D. with three independent replicates.  $P$ -values were calculated by a two-tailed Student's  $t$ -test. \* $P < 0.05$ , and \*\* $P < 0.01$ .

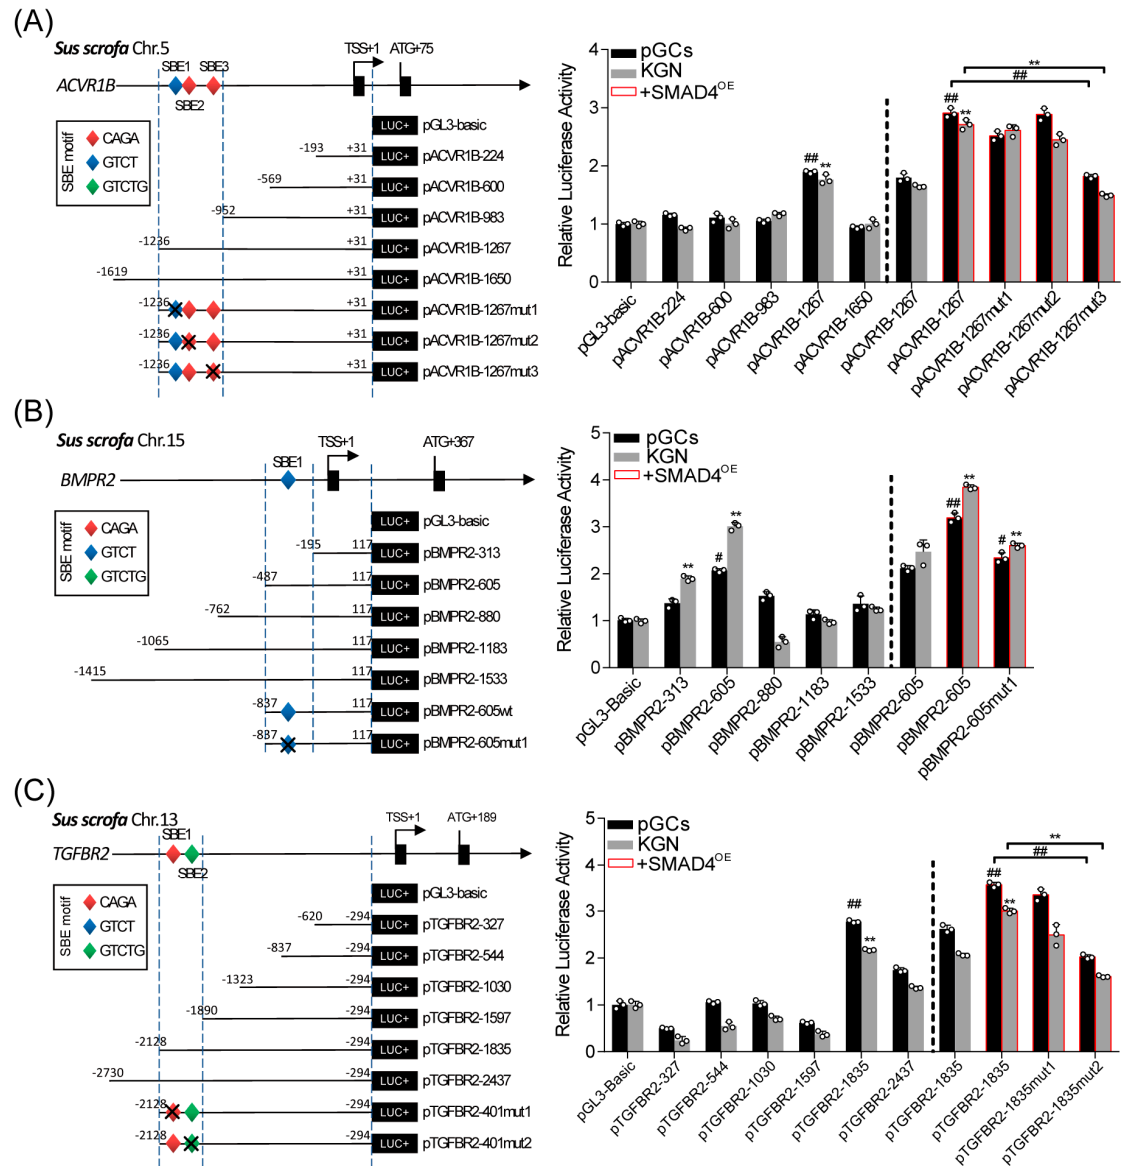

**Figure S3.** SMAD4 elevates the promoter activity of upstream receptors by binding to the SBEs within their promoters. (A-C). Left panel, diagrams showing the construction of recombined pGL3-basic reporter vectors containing the 5'-UTR of porcine *ACVR1B* (A), *BMP2* (B), and *TGFB2* (C) with wild-type or mutant type SBEs. The transcription start sites (TSSs) are indicated by black arrows. The different SBE motifs are shown as diamonds with different colors (blue: GTCT motif, red: CAGA motif, green: GTCTG motif). Right panel, Luciferase activity assays. The recombined reporter vectors were transfected into porcine GCs or KGN cells with or without SMAD4 stimulation for 24 h, and their activities were measured. Data were shown as mean  $\pm$  S.D. with three independent repeats. \*, #  $P < 0.05$  and \*\*, ###  $P < 0.01$  values were calculated by Student's *t*-test.

>Porcine *ACVR1B* core promoter (-1258/-889)

AATTAC**GTCT** AGATACTTAT ATCGCAA**CAG** **A**ACAAAGGGA GGGGAAAAAA TGTATACATG  
 -1250/-1247 -1229/-1226  
 TAAGTGTAAC TTGCTGTGCA GTGGGGAAAA AAAAAAACAA AACCTGCCCT TTACGTGATT  
 TCAGTCAAGC TCTTTTTCAG GCTAGGGAAA AGGAATTCTT TTTCAAAAAG ACATGGGTGA  
 TTCAGTTTAC CTTCTATAAG CAGTTTTTTC TAAATTTGAA AGTAACACCT GCTTATTGGT  
 AAAATATTTA GAAAACACTA AACTGTTTAA AGAAAAAGTA AAAAATTATT CTGGTGATAA  
 CTACTGATAA TACTGGGTCA TTTCCTTCCA GCCTTTTTTTT CCAA**CAGAG** GTAGAGTATC  
 -911/-908  
 AACAAAATTA

>Porcine *BMPR2* core promoter (-450/-195)

AAGAGAGGAA GAAGTACACC GGAGAGGGCT AGAAAGGGCA GCCTCCCCGC ACCTCCCCTC  
 CGCCCGCT**GT** **CT**TGGGGAGC TCGGGGCCCG GCCTGCAGAC CCCTCCCCTC CCCCCTTCC  
 -381/-378  
 CACCGCCCCT CAGCCCTCCG GCTGGGACCT GCCAGACCCT CGCAGGATTG TTCCGCGAAG  
 ACGTGAAGGC GGTGGGTTTG TCCATGGAGG CAGGCACCTT TTTCGATCCA GTCGAGGAAG  
 AGGATTTGCT GTGCT

>Porcine *TGFBR2* core promoter (-2140/-1980)

TTGTTTATTT ATCCAACAAA TACCTATTAA ATATCTAGGT CCTGGGGATA CAGTAGTGAG  
 TGGAAGCTAA GATATCACTC CTGTCTCAA GAAATCTGGA CTTGAGTCCA AAGAGAAGGG  
 AGAGGAAAGA ATGGCA**CAGA** ATTATTACAA AACTACAGCT GTAGTGGGCA GGCCGATGGT  
 -2004/-2001  
 GCCAAGGGAA TCTATAATAA AAT**GTCTG**CT GGGAGGGGAG GTCAGGGAGA GCTCACCCAT  
 -1936/-1932  
 CAAGGAAGTC

**Figure S4.** Characterization of the core promoter of porcine *ACVR1B*, *BMPR2*, and *TGFBR2*.

The sequences showing the core promoter of porcine *ACVR1B*, *BMPR2*, and *TGFBR2*. The potential SBE motifs within these regions are labeled with different colors (blue: GTCT, red: CAGA, and green: GTCTG) and their locations were also shown below. TSS was considered as +1.

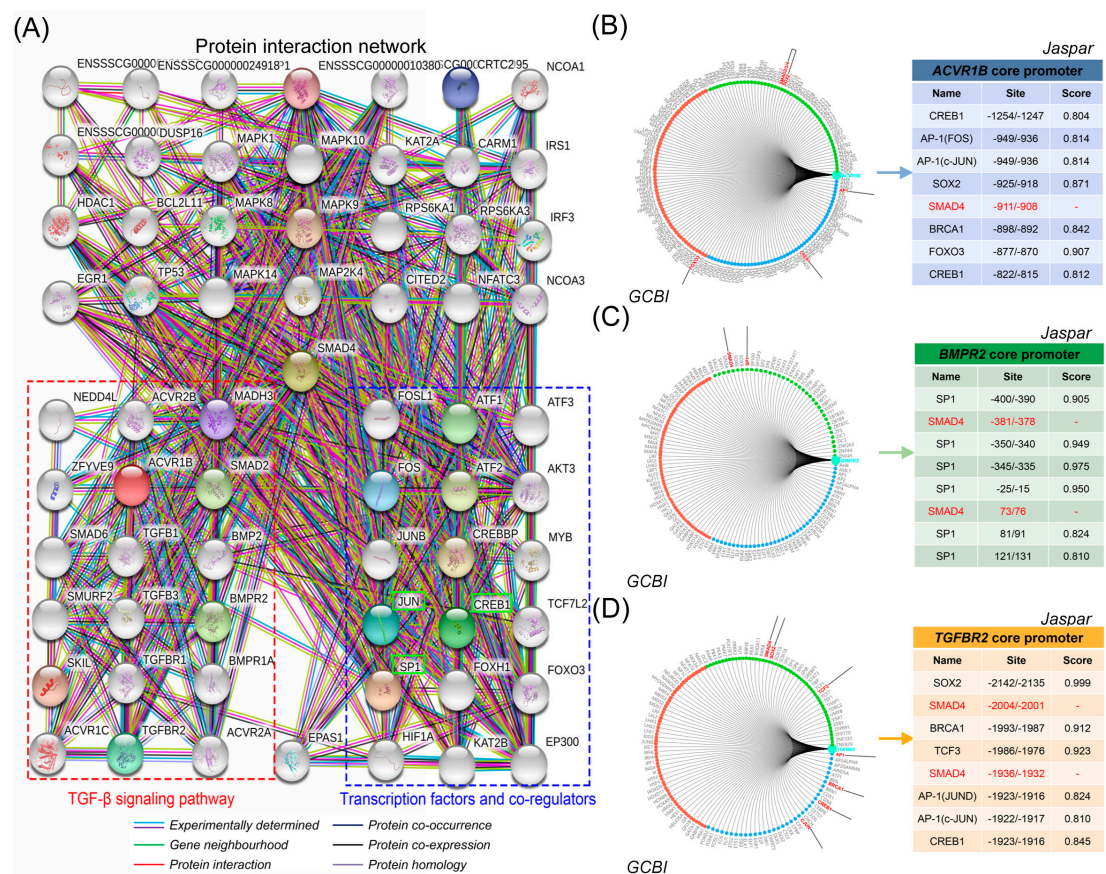

**Figure S5.** Predictive analysis of co-regulators involved in the SMAD4-mediated feedback regulation progress. **(A)** SMAD4-associated proteins were analyzed by STRING and their interactions were shown in a PPI interaction network. The red dotted box indicates a collection of TGF- $\beta$  family members, and the blue dotted box shows a collection of transcription factors and co-regulators. Different interaction modes between nodes were indicated by colorful lines. **(B-D)**. Left panel, potential co-regulators target porcine *ACVR1B* **(B)**, *BMPR2* **(C)**, and *TGFBR2* **(D)** were predicted by GCBI database. Right panel, the binding motifs of co-regulators (c-JUN, CREB1, and SP1) and their locations within the core promoter of porcine *ACVR1B*, *BMPR2*, and *TGFBR2* were analyzed by JASPAR database. The locations of validated SBEs were shown in red. The score ranges from 0 (low) to 1 (high).

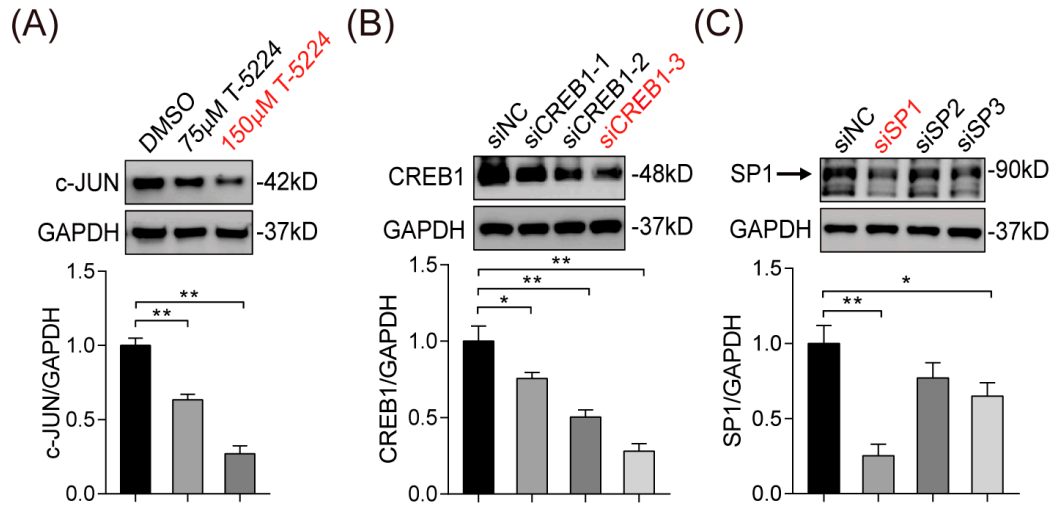

**Figure S6.** Knockdown or inhibitory efficiency detection. **(A)** The protein levels of c-JUN in porcine GCs treated with T-5224 at different concentration (75μM and 150μM) were detected by western blotting assay. **(B)** The protein levels of CREB1 in porcine GCs treated with three specific-siRNAs were measured by western blotting. **(C)** After treatment with three siRNAs specifically targeting SP1, the protein levels of SP1 were determined by western blotting assays. The concentration of T5224 and siRNAs labeled in red were chosen for further research. Data in **A-C** were described as mean  $\pm$  S.D. with three independent repeats. *P*-values were calculated by a two-tailed Student's *t*-test. \**P* < 0.01, \*\**P* < 0.01.

**Table S1.** Differentially expressed mRNAs in SMAD4-reduced porcine GCs

| Gene     | Log <sub>2</sub> FC | P-value  | Regulation | Gene     | Log <sub>2</sub> FC | P-value  | Regulation |
|----------|---------------------|----------|------------|----------|---------------------|----------|------------|
| MED29    | 6.476               | 3.23E-25 | up         | RFC3     | 0.612               | 4.34E-03 | up         |
| OASL     | 3.970               | 1.82E-13 | up         | APOO     | 0.611               | 3.99E-04 | up         |
| CEP57    | 3.861               | 2.91E-08 | up         | CKS2     | 0.610               | 7.97E-14 | up         |
| RSAD2    | 3.784               | 1.68E-22 | up         | PSMF1    | 0.609               | 2.86E-09 | up         |
| UNC119   | 3.668               | 1.21E-23 | up         | SPHK2    | 0.609               | 2.50E-03 | up         |
| IQCE     | 3.668               | 2.00E-04 | up         | ATF5     | 0.607               | 1.52E-06 | up         |
| KIF3C    | 3.561               | 6.39E-07 | up         | FKBP11   | 0.606               | 2.27E-09 | up         |
| UBN1     | 3.561               | 3.73E-04 | up         | RAB42    | 0.606               | 1.58E-04 | up         |
| ASB9     | 3.528               | 1.36E-22 | up         | MDK      | 0.605               | 1.05E-07 | up         |
| CTF1     | 3.320               | 9.80E-06 | up         | STAM2    | 0.604               | 3.93E-03 | up         |
| VPS41    | 3.200               | 3.17E-27 | up         | NCBP2    | 0.603               | 3.53E-04 | up         |
| RDM1     | 3.183               | 1.14E-03 | up         | NCAPH    | 0.601               | 1.27E-03 | up         |
| NDP      | 3.183               | 2.70E-06 | up         | CCT6A    | 0.600               | 1.80E-06 | up         |
| OAS1     | 3.157               | 1.63E-82 | up         | FGFR4    | 0.598               | 1.74E-04 | up         |
| CXCL10   | 3.031               | 3.24E-05 | up         | GLYCTK   | 0.596               | 2.00E-03 | up         |
| NPNT     | 3.031               | 6.34E-03 | up         | SERPINB2 | 0.595               | 7.27E-18 | up         |
| EIF2S2   | 2.963               | 2.89E-17 | up         | TMA16    | 0.595               | 1.05E-03 | up         |
| CAAT3    | 2.920               | 4.73E-03 | up         | POC1A    | 0.595               | 2.28E-06 | up         |
| SRSF12   | 2.861               | 9.64E-07 | up         | CCHCR1   | 0.595               | 1.24E-02 | up         |
| IFITM1   | 2.856               | 0.00E+00 | up         | CKS1B    | 0.594               | 2.69E-07 | up         |
| LRWD1    | 2.843               | 6.85E-08 | up         | NPHP1    | 0.593               | 3.75E-03 | up         |
| CSF1     | 2.800               | 2.43E-07 | up         | COPS2    | 0.593               | 4.06E-03 | up         |
| ZNF131   | 2.768               | 3.58E-12 | up         | C10orf54 | 0.586               | 3.22E-03 | up         |
| TEKT1    | 2.735               | 6.31E-04 | up         | ZNF205   | 0.586               | 4.13E-06 | up         |
| SOX9     | 2.709               | 1.10E-04 | up         | RUVBL2   | 0.585               | 1.95E-27 | up         |
| RSPH3    | 2.668               | 1.42E-05 | up         | EPN1     | 0.585               | 1.01E-15 | up         |
| MPHOSPH6 | 2.668               | 4.60E-04 | up         | KLF13    | -0.586              | 1.06E-04 | down       |
| C9orf85  | 2.668               | 1.07E-02 | up         | MTURN    | -0.586              | 1.01E-16 | down       |
| APRT     | 2.620               | 4.49E-11 | up         | FRZB     | -0.586              | 3.31E-08 | down       |
| ANKRD26  | 2.561               | 1.44E-03 | up         | TUBG2    | -0.587              | 1.69E-08 | down       |
| OPTC     | 2.446               | 1.87E-03 | up         | PPFIA1   | -0.589              | 2.99E-03 | down       |
| ZNF467   | 2.446               | 6.47E-03 | up         | FITM2    | -0.590              | 2.00E-08 | down       |
| TARS     | 2.430               | 4.60E-22 | up         | LRRC57   | -0.590              | 3.08E-03 | down       |
| GSTP1    | 2.379               | 2.88E-11 | up         | CST3     | -0.592              | 0.00E+00 | down       |
| NOC3L    | 2.364               | 1.82E-04 | up         | PIK3R3   | -0.592              | 1.29E-02 | down       |
| TTC12    | 2.339               | 1.49E-08 | up         | HGSNAT   | -0.592              | 4.78E-03 | down       |
| DHRS9    | 2.320               | 7.04E-03 | up         | CCDC92   | -0.593              | 5.23E-04 | down       |

|          |       |          |    |           |        |          |      |
|----------|-------|----------|----|-----------|--------|----------|------|
| CASP1    | 2.276 | 3.63E-03 | up | SMAD7     | -0.593 | 5.05E-06 | down |
| EPS8     | 2.276 | 5.83E-03 | up | SVEP1     | -0.594 | 6.72E-11 | down |
| STAG1    | 2.276 | 9.45E-03 | up | KDSR      | -0.595 | 2.35E-03 | down |
| IFIT1    | 2.251 | 3.40E-10 | up | LPPR3     | -0.597 | 3.17E-03 | down |
| PRICKLE4 | 2.223 | 3.82E-18 | up | SLC25A13  | -0.597 | 2.73E-09 | down |
| BBS1     | 2.219 | 9.34E-03 | up | IARS2     | -0.597 | 3.20E-04 | down |
| EIF3H    | 2.211 | 1.27E-09 | up | UNC45B    | -0.599 | 5.09E-28 | down |
| TRAF7    | 2.210 | 1.07E-16 | up | KCTD20    | -0.600 | 4.16E-03 | down |
| LSM8     | 2.203 | 1.97E-08 | up | HOPX      | -0.601 | 2.72E-03 | down |
| NDC80    | 2.183 | 1.18E-04 | up | LSS       | -0.603 | 2.20E-09 | down |
| SIVA     | 2.183 | 5.66E-04 | up | COL16A1   | -0.603 | 1.06E-07 | down |
| RNF13    | 2.183 | 7.11E-03 | up | ANO6      | -0.603 | 1.39E-05 | down |
| SA6L     | 2.183 | 2.32E-04 | up | FN1       | -0.603 | 2.03E-16 | down |
| TUBA3D   | 2.141 | 1.69E-07 | up | ANTXR1    | -0.604 | 1.39E-07 | down |
| CCL5     | 2.141 | 0.00E+00 | up | RBM33     | -0.604 | 7.48E-03 | down |
| HINT3    | 2.124 | 2.65E-04 | up | CD59      | -0.604 | 6.55E-06 | down |
| IFIT2    | 2.124 | 4.25E-08 | up | EMC7      | -0.607 | 5.81E-03 | down |
| SIL1     | 2.115 | 3.02E-05 | up | SLC45A3   | -0.608 | 2.40E-04 | down |
| IRF4     | 2.100 | 7.27E-06 | up | UNC119B   | -0.609 | 1.00E-11 | down |
| BST2     | 2.094 | 0.00E+00 | up | FBXO32    | -0.609 | 1.75E-16 | down |
| EVC2     | 2.083 | 4.92E-12 | up | CYP2C91   | -0.611 | 6.70E-03 | down |
| BCL2A1   | 2.083 | 2.60E-03 | up | TBC1D1    | -0.611 | 2.79E-07 | down |
| GCAT     | 2.063 | 2.11E-07 | up | PDLIM1    | -0.614 | 3.34E-16 | down |
| MADD     | 2.049 | 1.79E-05 | up | KREMEN1   | -0.615 | 2.02E-03 | down |
| LRRC16A  | 2.031 | 8.91E-04 | up | INO80B    | -0.617 | 2.06E-03 | down |
| TSNAXIP1 | 2.031 | 1.04E-02 | up | TRIO      | -0.619 | 2.46E-05 | down |
| HIST1H4D | 2.031 | 2.93E-03 | up | ARX       | -0.619 | 7.76E-07 | down |
| WNT7B    | 2.016 | 8.37E-06 | up | TNNT1     | -0.622 | 2.24E-04 | down |
| FREM2    | 1.977 | 3.54E-04 | up | TNFAIP8L3 | -0.623 | 7.53E-16 | down |
| SLC30A6  | 1.977 | 1.52E-07 | up | C1orf226  | -0.625 | 6.25E-03 | down |
| TTC32    | 1.948 | 1.22E-02 | up | VAMP2     | -0.625 | 5.53E-04 | down |
| VAMP5    | 1.947 | 5.96E-29 | up | TXNRD1    | -0.626 | 7.71E-04 | down |
| LRRC56   | 1.931 | 1.31E-03 | up | USP13     | -0.627 | 6.69E-03 | down |
| HLA-G    | 1.923 | 0.00E+00 | up | PTPRM     | -0.628 | 3.36E-06 | down |
| MRPS16   | 1.901 | 5.68E-05 | up | PAM       | -0.629 | 3.77E-05 | down |
| CKAP2    | 1.889 | 9.37E-03 | up | STK24     | -0.630 | 6.10E-03 | down |
| S100A11  | 1.878 | 0.00E+00 | up | EFCAB14   | -0.632 | 4.89E-04 | down |
| KIAA1328 | 1.861 | 2.39E-05 | up | NNT       | -0.632 | 5.35E-06 | down |
| GSR      | 1.861 | 7.17E-04 | up | KIAA0513  | -0.633 | 2.22E-13 | down |
| GBP4     | 1.845 | 3.08E-05 | up | EMILIN1   | -0.633 | 1.85E-12 | down |

|              |       |          |    |         |        |          |      |
|--------------|-------|----------|----|---------|--------|----------|------|
| IREB2        | 1.837 | 3.71E-03 | up | VAT1L   | -0.634 | 1.99E-04 | down |
| ISG20        | 1.820 | 1.79E-06 | up | CHI3L1  | -0.635 | 1.47E-22 | down |
| C12orf75     | 1.815 | 3.51E-20 | up | UST     | -0.636 | 3.25E-11 | down |
| PGLYRP2      | 1.815 | 4.56E-03 | up | EFNA1   | -0.639 | 5.14E-03 | down |
| EIF5A2       | 1.809 | 4.21E-03 | up | SMURF1  | -0.639 | 8.92E-04 | down |
| PKMYT1       | 1.809 | 2.91E-03 | up | LRRFIP1 | -0.640 | 6.61E-07 | down |
| FABP3        | 1.802 | 2.45E-08 | up | RAB3A   | -0.641 | 9.24E-03 | down |
| PNPT1        | 1.800 | 4.18E-03 | up | ABCC5   | -0.642 | 3.35E-05 | down |
| MLF1         | 1.787 | 6.31E-03 | up | GAS6    | -0.645 | 2.87E-14 | down |
| TRMT5        | 1.775 | 1.38E-04 | up | ADAM19  | -0.645 | 5.43E-05 | down |
| ZNF630       | 1.768 | 1.75E-03 | up | GPR176  | -0.645 | 7.85E-03 | down |
| ALG6         | 1.754 | 4.81E-04 | up | UBE2E2  | -0.648 | 3.61E-04 | down |
| DPF1         | 1.749 | 7.72E-03 | up | GABARAP | -0.648 | 9.57E-07 | down |
| CALR3        | 1.749 | 4.00E-04 | up | FAM81A  | -0.649 | 4.72E-03 | down |
| AKR1E2       | 1.709 | 3.45E-05 | up | LTBP1   | -0.649 | 1.48E-18 | down |
| SLA-5        | 1.708 | 0.00E+00 | up | PTPRJ   | -0.650 | 5.92E-03 | down |
| DUS3L        | 1.704 | 3.49E-07 | up | GDNF    | -0.651 | 1.30E-02 | down |
| ORC3         | 1.702 | 4.49E-05 | up | THSD4   | -0.652 | 1.20E-06 | down |
| GRIA1        | 1.698 | 1.91E-06 | up | PHF21A  | -0.655 | 8.09E-03 | down |
| BUB1B        | 1.650 | 2.11E-04 | up | SIK2    | -0.657 | 1.54E-04 | down |
| COX11        | 1.650 | 3.46E-04 | up | DST     | -0.660 | 1.54E-05 | down |
| SPINT1       | 1.650 | 1.10E-02 | up | ARPC5   | -0.660 | 8.50E-27 | down |
| CTDNEP1      | 1.646 | 8.52E-18 | up | HSPG2   | -0.661 | 3.78E-19 | down |
| CDK1         | 1.641 | 3.60E-07 | up | LUZP1   | -0.666 | 1.45E-07 | down |
| UGGT2        | 1.639 | 6.19E-04 | up | CHSY3   | -0.667 | 3.46E-03 | down |
| LGALS9       | 1.630 | 0.00E+00 | up | TMEM2   | -0.668 | 1.14E-06 | down |
| MCHR1        | 1.627 | 9.09E-03 | up | MRAS    | -0.672 | 1.59E-11 | down |
| AIPL1        | 1.616 | 9.69E-03 | up | CTSL    | -0.672 | 1.07E-19 | down |
| ETV7         | 1.598 | 4.57E-04 | up | RAB28   | -0.674 | 1.87E-12 | down |
| FAM126B      | 1.598 | 2.94E-03 | up | COL4A5  | -0.677 | 9.78E-06 | down |
| TNF10-like   | 1.598 | 2.74E-03 | up | MAMLD1  | -0.680 | 6.48E-03 | down |
| C2           | 1.595 | 1.39E-19 | up | HIBADH  | -0.681 | 1.26E-03 | down |
| HLA-11a-like | 1.592 | 0.00E+00 | up | SUSD1   | -0.681 | 1.22E-04 | down |
| QRFPR        | 1.589 | 3.76E-04 | up | TRAF5   | -0.683 | 4.80E-03 | down |
| MDFI         | 1.577 | 6.77E-04 | up | COL8A1  | -0.684 | 5.09E-09 | down |
| GHDC         | 1.572 | 4.53E-05 | up | EPB41L1 | -0.685 | 1.51E-12 | down |
| DDX58        | 1.571 | 4.96E-11 | up | ACTA2   | -0.686 | 0.00E+00 | down |
| PAQR7        | 1.568 | 5.07E-08 | up | ALOX12  | -0.687 | 7.62E-04 | down |
| HA-2a-like   | 1.568 | 3.20E-17 | up | PTRHD1  | -0.689 | 1.03E-03 | down |
| SKA1         | 1.553 | 1.56E-03 | up | CDV3    | -0.690 | 1.76E-04 | down |

|              |       |          |    |          |        |          |      |
|--------------|-------|----------|----|----------|--------|----------|------|
| HMGB3        | 1.549 | 1.32E-05 | up | FBXL7    | -0.691 | 1.73E-04 | down |
| CYP39A1      | 1.546 | 9.35E-05 | up | EFTUD1   | -0.691 | 5.14E-03 | down |
| DTX3         | 1.539 | 8.89E-09 | up | DAB2IP   | -0.692 | 6.05E-03 | down |
| TGFA         | 1.539 | 6.70E-05 | up | PPT1     | -0.698 | 7.81E-06 | down |
| GZMA         | 1.539 | 7.11E-04 | up | PCSK6    | -0.698 | 1.17E-03 | down |
| ERAP2        | 1.536 | 9.68E-04 | up | ADAMDEC1 | -0.699 | 2.74E-06 | down |
| AP4S1        | 1.518 | 9.33E-04 | up | HSDL1    | -0.699 | 2.26E-03 | down |
| KIF17        | 1.513 | 1.22E-02 | up | GCDH     | -0.700 | 2.96E-03 | down |
| LY6G5B       | 1.513 | 8.31E-03 | up | PRKCB    | -0.700 | 9.63E-03 | down |
| XRCC2        | 1.513 | 1.02E-03 | up | AKAP2    | -0.701 | 3.85E-10 | down |
| SLA-1        | 1.503 | 0.00E+00 | up | RPLP1    | -0.702 | 2.29E-03 | down |
| SP100        | 1.503 | 1.19E-04 | up | CEBPB    | -0.704 | 2.52E-06 | down |
| AKAP7        | 1.493 | 1.16E-02 | up | GADD45G  | -0.705 | 5.32E-03 | down |
| MX2          | 1.492 | 7.36E-28 | up | CRIP1    | -0.706 | 1.03E-03 | down |
| CXCL5        | 1.486 | 3.32E-16 | up | TRAF6    | -0.706 | 2.78E-03 | down |
| UQCC1        | 1.483 | 2.12E-03 | up | FUCA1    | -0.707 | 2.58E-22 | down |
| IFI44L       | 1.480 | 2.03E-18 | up | AHNAK    | -0.708 | 2.11E-14 | down |
| HERC5        | 1.465 | 2.56E-29 | up | B4GALT5  | -0.708 | 6.10E-06 | down |
| PSMB9        | 1.455 | 3.01E-16 | up | ASAP1    | -0.710 | 1.77E-05 | down |
| NHP2L1       | 1.446 | 6.68E-10 | up | CAP1     | -0.710 | 6.60E-18 | down |
| xp_003846342 | 1.446 | 1.56E-04 | up | FHL1     | -0.711 | 2.06E-24 | down |
| ZNF354A      | 1.446 | 4.18E-03 | up | SPARC    | -0.714 | 0.00E+00 | down |
| NRTN         | 1.446 | 8.13E-04 | up | ACVR1B   | -0.714 | 1.34E-09 | down |
| CMPK2        | 1.433 | 6.95E-24 | up | PLA2G3   | -0.721 | 1.45E-17 | down |
| UBA7         | 1.426 | 2.12E-15 | up | NAV2     | -0.723 | 9.40E-03 | down |
| ADSS-1       | 1.416 | 1.03E-04 | up | LIMD1    | -0.724 | 9.37E-04 | down |
| PIFO         | 1.411 | 3.19E-05 | up | COL9A2   | -0.725 | 1.90E-05 | down |
| JMJD7        | 1.402 | 3.87E-03 | up | MYLK     | -0.728 | 2.84E-06 | down |
| PLAC8        | 1.391 | 2.25E-17 | up | EDNRA    | -0.730 | 4.57E-06 | down |
| HDAC1        | 1.390 | 3.05E-20 | up | TTC13    | -0.730 | 3.81E-03 | down |
| GORAB        | 1.385 | 9.25E-04 | up | SH3RF1   | -0.731 | 1.60E-05 | down |
| PTTG1        | 1.374 | 9.37E-15 | up | BPI      | -0.731 | 1.26E-11 | down |
| SLA-3        | 1.374 | 0.00E+00 | up | CD34     | -0.732 | 6.96E-08 | down |
| RAC2         | 1.364 | 6.52E-03 | up | VHL      | -0.733 | 1.74E-03 | down |
| SULT1C4      | 1.357 | 4.92E-05 | up | CRIM1    | -0.734 | 1.08E-22 | down |
| EXO7         | 1.356 | 9.32E-03 | up | CHRD1    | -0.735 | 2.08E-19 | down |
| C1orf52      | 1.353 | 3.02E-04 | up | PRR15    | -0.737 | 2.95E-06 | down |
| SLC35G3      | 1.346 | 3.17E-03 | up | FRY      | -0.738 | 3.87E-03 | down |
| VRK1         | 1.325 | 8.94E-05 | up | ITGA6    | -0.739 | 8.03E-05 | down |
| RNF115       | 1.320 | 4.76E-05 | up | EPB41L3  | -0.740 | 3.68E-03 | down |

|                |       |          |    |            |        |          |      |
|----------------|-------|----------|----|------------|--------|----------|------|
| IRAK2          | 1.320 | 6.62E-07 | up | ATP6V1A    | -0.741 | 1.78E-17 | down |
| WASPH1-like    | 1.320 | 8.66E-03 | up | NRG4       | -0.743 | 3.91E-03 | down |
| BLOC1S6        | 1.320 | 2.28E-07 | up | G0S2       | -0.746 | 3.67E-06 | down |
| sestrin-2-like | 1.317 | 2.05E-10 | up | TPM1       | -0.747 | 1.24E-28 | down |
| GJD4           | 1.308 | 6.85E-03 | up | ARHGAP10   | -0.748 | 1.30E-03 | down |
| TRAPPC8        | 1.286 | 5.50E-04 | up | BMPR2      | -0.751 | 2.19E-09 | down |
| CTSS           | 1.276 | 2.06E-03 | up | TTC17      | -0.751 | 3.42E-04 | down |
| IFITM2         | 1.274 | 0.00E+00 | up | FAM13A     | -0.753 | 6.69E-03 | down |
| HLA-A          | 1.274 | 0.00E+00 | up | CCDC167    | -0.753 | 2.62E-12 | down |
| IFI27          | 1.262 | 0.00E+00 | up | DDAH1      | -0.754 | 3.50E-08 | down |
| ARHGEF39       | 1.262 | 2.53E-03 | up | PHD23-like | -0.757 | 2.89E-04 | down |
| KDM4B          | 1.258 | 1.34E-20 | up | HERPUD2    | -0.759 | 6.84E-04 | down |
| KIF18B         | 1.258 | 3.58E-04 | up | ACP2       | -0.760 | 7.22E-04 | down |
| IMP4           | 1.257 | 2.56E-21 | up | PALM2      | -0.761 | 9.05E-04 | down |
| CD2AP          | 1.248 | 2.12E-03 | up | PPP1R12B   | -0.764 | 7.86E-17 | down |
| TRPC6          | 1.247 | 3.54E-03 | up | TANC1      | -0.765 | 5.41E-04 | down |
| FAM198B        | 1.246 | 4.08E-13 | up | FBN1       | -0.766 | 4.96E-28 | down |
| TWIST2         | 1.240 | 1.03E-03 | up | VTI1A      | -0.767 | 8.83E-03 | down |
| BUB1           | 1.229 | 1.42E-04 | up | CTNNA2     | -0.768 | 1.47E-04 | down |
| MAPKBP1        | 1.224 | 1.59E-03 | up | ID2        | -0.774 | 3.82E-30 | down |
| H1.4-like      | 1.224 | 1.14E-02 | up | SMAD9      | -0.775 | 4.77E-05 | down |
| CDT1           | 1.223 | 1.16E-08 | up | C1orf43    | -0.776 | 5.87E-08 | down |
| FAM83D         | 1.221 | 1.87E-03 | up | SCHIP1     | -0.776 | 2.36E-05 | down |
| PBK            | 1.220 | 1.01E-03 | up | ITGA8      | -0.777 | 2.65E-22 | down |
| WDR37          | 1.219 | 3.20E-17 | up | THBS1      | -0.778 | 0.00E+00 | down |
| UBL7           | 1.216 | 4.28E-19 | up | LUM        | -0.779 | 1.12E-03 | down |
| IL18BP         | 1.215 | 3.01E-03 | up | FHL3       | -0.779 | 7.48E-20 | down |
| TTC37          | 1.215 | 9.23E-03 | up | LTBP2      | -0.779 | 2.19E-08 | down |
| IFITM3         | 1.213 | 0.00E+00 | up | ALDH1B1    | -0.779 | 3.53E-06 | down |
| ESPL1          | 1.209 | 3.11E-06 | up | WNK2       | -0.779 | 3.13E-03 | down |
| RNF17          | 1.205 | 8.22E-03 | up | ERG        | -0.781 | 2.45E-04 | down |
| KCNAB3         | 1.202 | 5.27E-04 | up | TIMP3      | -0.781 | 2.25E-03 | down |
| ARMC8          | 1.200 | 2.96E-08 | up | FZD4       | -0.781 | 1.42E-10 | down |
| SSSCA1         | 1.199 | 2.25E-21 | up | ARHGEF7    | -0.784 | 3.54E-03 | down |
| CMZ-8-like     | 1.197 | 1.38E-08 | up | GRTP1      | -0.788 | 9.97E-03 | down |
| SEC22B         | 1.194 | 2.10E-07 | up | SLC26A2    | -0.790 | 1.44E-06 | down |
| TMX3           | 1.191 | 1.55E-03 | up | ADAM12     | -0.792 | 3.03E-25 | down |
| AGRN           | 1.185 | 1.71E-11 | up | C1orf115   | -0.796 | 9.71E-17 | down |
| USP32          | 1.183 | 2.83E-03 | up | CDYL2      | -0.801 | 4.21E-05 | down |
| Np_001008925   | 1.183 | 8.29E-05 | up | OLFML2B    | -0.802 | 4.87E-09 | down |

|           |       |          |    |            |        |          |      |
|-----------|-------|----------|----|------------|--------|----------|------|
| MFAP2     | 1.183 | 3.01E-03 | up | ANXA8      | -0.803 | 1.08E-15 | down |
| MXD3      | 1.183 | 1.62E-06 | up | RAI14      | -0.805 | 8.24E-05 | down |
| UTP23     | 1.183 | 1.64E-03 | up | UBL5       | -0.808 | 4.03E-11 | down |
| SUMO2     | 1.183 | 1.87E-03 | up | DESI2      | -0.809 | 5.19E-09 | down |
| UNC93B1   | 1.172 | 3.56E-27 | up | PRUNE2     | -0.809 | 2.97E-04 | down |
| RPP25     | 1.170 | 2.08E-12 | up | CCNDBP1    | -0.810 | 6.34E-09 | down |
| SCNN1D    | 1.169 | 5.29E-05 | up | ARSB       | -0.811 | 1.94E-15 | down |
| B2M       | 1.167 | 0.00E+00 | up | TMEM158    | -0.813 | 3.00E-05 | down |
| CHD6      | 1.162 | 7.27E-04 | up | NAV3       | -0.815 | 1.17E-03 | down |
| SLC15A3   | 1.162 | 2.01E-24 | up | DNAJC8     | -0.815 | 7.60E-06 | down |
| NDUFA6    | 1.162 | 4.31E-15 | up | EPHB6      | -0.816 | 1.63E-03 | down |
| TLL1      | 1.151 | 3.43E-03 | up | ECE1       | -0.819 | 5.29E-17 | down |
| PTK2      | 1.146 | 2.83E-05 | up | KLHL5      | -0.819 | 6.84E-03 | down |
| LRTOMT    | 1.141 | 2.16E-03 | up | TSPAN2     | -0.820 | 2.59E-03 | down |
| LRRN4CL   | 1.141 | 9.00E-04 | up | AD3MB2     | -0.822 | 2.82E-03 | down |
| ELP5      | 1.137 | 9.84E-11 | up | RND1       | -0.822 | 1.54E-08 | down |
| PGAM2     | 1.132 | 2.41E-06 | up | LYSMD4     | -0.824 | 1.12E-03 | down |
| APITD1    | 1.130 | 2.22E-05 | up | KANK1      | -0.825 | 4.77E-03 | down |
| SLC26A6   | 1.127 | 8.49E-08 | up | PROS1      | -0.826 | 2.70E-06 | down |
| INCENP    | 1.126 | 2.50E-07 | up | CLCN7      | -0.826 | 8.17E-05 | down |
| IRF7      | 1.125 | 2.47E-25 | up | WBSCR17    | -0.827 | 3.10E-03 | down |
| FAXC      | 1.124 | 1.20E-02 | up | SMAD4      | -0.828 | 5.46E-03 | down |
| CCNB2     | 1.120 | 4.24E-07 | up | ARMC10     | -0.828 | 3.79E-04 | down |
| IQGAP3    | 1.120 | 3.00E-07 | up | DCLK2      | -0.828 | 1.47E-03 | down |
| R3HCC1L   | 1.117 | 8.64E-06 | up | PRELP      | -0.828 | 1.74E-08 | down |
| GDPD1     | 1.109 | 8.29E-03 | up | NEDD9      | -0.828 | 2.39E-05 | down |
| CCNA2     | 1.104 | 7.82E-08 | up | DENND3     | -0.831 | 7.35E-03 | down |
| LYRM7     | 1.102 | 7.11E-03 | up | KIDINS220  | -0.831 | 9.26E-06 | down |
| FAM195A   | 1.102 | 1.10E-06 | up | THBS2      | -0.832 | 2.17E-20 | down |
| MICB      | 1.099 | 3.77E-09 | up | RASL11B    | -0.836 | 1.53E-05 | down |
| IFIT3     | 1.092 | 1.56E-24 | up | CSGALNACT1 | -0.836 | 2.21E-04 | down |
| NUF2      | 1.092 | 7.51E-03 | up | VCL        | -0.837 | 6.33E-08 | down |
| CCNB1     | 1.092 | 9.86E-12 | up | NF-KB      | -0.837 | 6.92E-03 | down |
| CXCL2     | 1.086 | 5.69E-09 | up | PYCARD     | -0.838 | 1.71E-03 | down |
| UBE2C     | 1.084 | 3.38E-16 | up | MATF       | -0.839 | 4.54E-04 | down |
| TMEM150A  | 1.083 | 5.79E-06 | up | MAML2      | -0.845 | 2.74E-03 | down |
| UDP-like  | 1.083 | 1.12E-02 | up | CTNND2     | -0.847 | 5.34E-05 | down |
| GTSE1     | 1.082 | 1.60E-06 | up | TGFBI      | -0.849 | 9.30E-06 | down |
| FAM84A    | 1.079 | 1.24E-02 | up | GFRA3      | -0.851 | 1.33E-02 | down |
| TMPRSS11F | 1.078 | 4.00E-04 | up | KIAA1324   | -0.852 | 2.23E-03 | down |

|              |       |          |    |          |        |          |      |
|--------------|-------|----------|----|----------|--------|----------|------|
| BATF3        | 1.076 | 2.14E-05 | up | CRISPLD2 | -0.853 | 6.35E-03 | down |
| E2F1         | 1.075 | 4.87E-13 | up | A2M      | -0.854 | 1.05E-05 | down |
| SPAG9        | 1.070 | 2.33E-03 | up | KLHDC9   | -0.855 | 4.29E-03 | down |
| DTNB         | 1.067 | 9.61E-06 | up | ZNF516   | -0.857 | 1.20E-02 | down |
| DUSP15       | 1.065 | 3.40E-08 | up | MYOF     | -0.859 | 1.78E-12 | down |
| IL34         | 1.063 | 1.76E-04 | up | PRKCE    | -0.860 | 8.01E-04 | down |
| MRPS23       | 1.057 | 2.37E-08 | up | PLXNA2   | -0.861 | 4.04E-05 | down |
| KIF4A        | 1.057 | 9.72E-03 | up | MFSD4    | -0.867 | 3.51E-05 | down |
| ZFR          | 1.052 | 7.12E-06 | up | TJAP1    | -0.867 | 7.57E-04 | down |
| DDX1         | 1.051 | 1.21E-08 | up | GALC     | -0.867 | 4.72E-03 | down |
| RNF138       | 1.044 | 2.95E-04 | up | KLHL22   | -0.870 | 9.34E-03 | down |
| HDAC9        | 1.038 | 1.26E-02 | up | THYN1    | -0.872 | 1.49E-07 | down |
| B3GALNT2     | 1.031 | 1.15E-05 | up | MR1      | -0.874 | 1.78E-05 | down |
| FAM127A      | 1.031 | 6.93E-13 | up | TBC1D2B  | -0.875 | 1.90E-06 | down |
| TOMM40       | 1.031 | 1.24E-03 | up | MLANA    | -0.876 | 9.42E-07 | down |
| OSBPL11      | 1.031 | 1.26E-02 | up | TCF7     | -0.876 | 6.87E-05 | down |
| LOC100506562 | 1.022 | 1.81E-06 | up | CCL11    | -0.876 | 2.63E-03 | down |
| CEP170       | 1.021 | 7.61E-03 | up | CAMK1D   | -0.876 | 6.05E-03 | down |
| PLRG1        | 1.021 | 8.08E-04 | up | ALOX5AP  | -0.881 | 2.34E-03 | down |
| OAS2         | 1.020 | 1.15E-16 | up | COL12A1  | -0.887 | 3.14E-15 | down |
| HBA2         | 1.019 | 4.73E-06 | up | ELOVL6   | -0.891 | 1.66E-03 | down |
| POLD1        | 1.015 | 6.99E-09 | up | RASGRP3  | -0.899 | 3.21E-07 | down |
| SMKR1        | 1.013 | 3.89E-04 | up | NADSYN1  | -0.901 | 3.10E-06 | down |
| C6orf211     | 1.009 | 1.35E-03 | up | F2       | -0.902 | 5.09E-03 | down |
| CIR1         | 1.002 | 8.87E-05 | up | RRNAD1   | -0.908 | 3.31E-05 | down |
| ZNF81        | 0.999 | 5.73E-03 | up | PID1     | -0.910 | 6.39E-19 | down |
| RGMA         | 0.994 | 7.30E-04 | up | MRVI1    | -0.913 | 2.72E-06 | down |
| TMEM52       | 0.989 | 2.60E-06 | up | DPP4     | -0.914 | 7.48E-04 | down |
| BFSP1        | 0.987 | 2.20E-03 | up | NREP     | -0.926 | 2.14E-05 | down |
| C10orf11     | 0.987 | 9.68E-05 | up | ELMO2    | -0.927 | 2.20E-05 | down |
| TMEM18       | 0.985 | 9.54E-10 | up | CSRP2    | -0.933 | 2.32E-17 | down |
| CCDC97       | 0.984 | 1.23E-02 | up | TGFB3    | -0.933 | 1.82E-06 | down |
| KIF2C        | 0.983 | 2.68E-10 | up | MRPS18B  | -0.935 | 3.55E-07 | down |
| HCST         | 0.983 | 4.00E-04 | up | SLC25A43 | -0.940 | 2.51E-04 | down |
| CTXN1        | 0.981 | 4.42E-03 | up | KLHL40   | -0.942 | 4.56E-05 | down |
| TMEM144      | 0.981 | 2.42E-04 | up | TMEM255A | -0.942 | 1.01E-39 | down |
| TBC1D23      | 0.980 | 4.50E-04 | up | PTPN14   | -0.946 | 9.94E-03 | down |
| EDNRB        | 0.980 | 1.05E-18 | up | SUN1     | -0.946 | 5.24E-04 | down |
| SRXN1        | 0.980 | 4.50E-12 | up | NBEAL2   | -0.948 | 1.58E-03 | down |
| HTRA2        | 0.974 | 1.15E-13 | up | ITGA11   | -0.950 | 2.86E-27 | down |

|           |       |          |    |               |        |          |      |
|-----------|-------|----------|----|---------------|--------|----------|------|
| NDUFAF2   | 0.972 | 2.84E-08 | up | REEP6         | -0.951 | 5.49E-05 | down |
| SYBU      | 0.970 | 4.28E-03 | up | KLF9          | -0.953 | 2.40E-10 | down |
| TOPBP1    | 0.970 | 1.14E-03 | up | ADAMTS9       | -0.955 | 2.46E-05 | down |
| SLA-7     | 0.964 | 5.07E-05 | up | VDAC3         | -0.957 | 4.59E-13 | down |
| CLPX      | 0.963 | 2.99E-03 | up | RHOJ          | -0.958 | 3.10E-03 | down |
| UBE2L6    | 0.962 | 8.06E-18 | up | DDX19B        | -0.959 | 2.55E-04 | down |
| CDCA3     | 0.953 | 1.72E-18 | up | CYP4F22       | -0.960 | 2.54E-03 | down |
| TMEM38B   | 0.951 | 1.46E-03 | up | SMAD6         | -0.962 | 1.76E-06 | down |
| EXPORTIN5 | 0.945 | 2.85E-25 | up | SMOC1         | -0.963 | 7.38E-03 | down |
| SDHAF4    | 0.939 | 2.24E-03 | up | EIF4EBP2      | -0.972 | 1.39E-16 | down |
| ILKAP     | 0.938 | 1.68E-05 | up | CD58          | -0.973 | 4.83E-04 | down |
| INSIG2    | 0.935 | 4.61E-03 | up | SRP14         | -0.975 | 2.79E-09 | down |
| DYDC2     | 0.935 | 3.33E-03 | up | MYH10         | -0.976 | 3.52E-19 | down |
| GNB4      | 0.935 | 7.38E-03 | up | KLHL38        | -0.981 | 1.31E-02 | down |
| XAF1      | 0.933 | 5.80E-29 | up | CORO2B        | -0.987 | 2.23E-07 | down |
| BAI2      | 0.933 | 9.49E-03 | up | CSNK1G1       | -0.987 | 1.61E-03 | down |
| PPP1R2    | 0.931 | 2.97E-08 | up | ABHD12B       | -0.993 | 7.17E-03 | down |
| C1QL4     | 0.930 | 1.08E-04 | up | KALRN         | -0.994 | 5.79E-04 | down |
| FCF1      | 0.925 | 1.26E-21 | up | PLEKHM3       | -0.997 | 2.92E-03 | down |
| SHARPIN   | 0.924 | 5.81E-11 | up | RASL11A       | -0.997 | 1.44E-07 | down |
| HSD3B1    | 0.922 | 0.00E+00 | up | ENO3          | -0.998 | 1.37E-22 | down |
| RBM34     | 0.921 | 2.44E-04 | up | MORC2         | -1.000 | 8.06E-14 | down |
| ITPKB     | 0.920 | 1.65E-05 | up | AGXT2         | -1.002 | 1.33E-08 | down |
| SPP1      | 0.918 | 1.33E-22 | up | TMOD1         | -1.005 | 8.91E-06 | down |
| IL15RA    | 0.917 | 2.65E-03 | up | KIAA1143      | -1.008 | 4.44E-03 | down |
| KCNK2     | 0.915 | 5.93E-04 | up | SAA1          | -1.009 | 1.82E-22 | down |
| NID1      | 0.905 | 1.98E-03 | up | RBP1          | -1.012 | 1.47E-11 | down |
| NAP1L3    | 0.903 | 6.52E-03 | up | PHKA2         | -1.013 | 5.08E-08 | down |
| SPAG5     | 0.898 | 7.08E-04 | up | C20orf196     | -1.013 | 1.13E-02 | down |
| FAM131C   | 0.897 | 1.49E-04 | up | COL11A1       | -1.019 | 1.05E-15 | down |
| TPX2      | 0.897 | 4.13E-04 | up | CNTNAP1       | -1.022 | 5.20E-03 | down |
| CCNF      | 0.896 | 1.11E-08 | up | TAF9          | -1.023 | 4.32E-03 | down |
| DUSP19    | 0.895 | 8.96E-03 | up | COLQ          | -1.027 | 6.84E-04 | down |
| DGKZ      | 0.893 | 3.52E-03 | up | HS6ST2        | -1.028 | 2.76E-03 | down |
| ORAI2     | 0.892 | 3.14E-03 | up | NPY1R         | -1.030 | 4.54E-05 | down |
| CCDC58    | 0.889 | 9.67E-06 | up | GEM           | -1.031 | 7.31E-14 | down |
| KIAA0556  | 0.888 | 5.36E-05 | up | TRIM63        | -1.033 | 3.91E-10 | down |
| ZNF678    | 0.887 | 6.79E-03 | up | CSAD          | -1.037 | 2.80E-03 | down |
| ORC1      | 0.886 | 9.85E-04 | up | MAST4         | -1.037 | 1.40E-03 | down |
| MARCH7    | 0.882 | 9.09E-03 | up | N-acetylgluco | -1.037 | 1.52E-03 | down |

|               |       |          |    |            |        |          |      |
|---------------|-------|----------|----|------------|--------|----------|------|
| PSME2         | 0.878 | 2.21E-14 | up | RFTN1      | -1.037 | 4.84E-03 | down |
| PRPF40A       | 0.874 | 2.50E-03 | up | ZNF365     | -1.038 | 2.69E-03 | down |
| IFI35         | 0.873 | 5.38E-08 | up | Protein-93 | -1.043 | 2.70E-06 | down |
| AURKA         | 0.873 | 5.84E-12 | up | AFF2       | -1.044 | 8.77E-04 | down |
| SFXN2         | 0.872 | 3.28E-03 | up | CDKN2B     | -1.049 | 4.23E-04 | down |
| MYL6          | 0.862 | 0.00E+00 | up | CASQ2      | -1.052 | 1.87E-03 | down |
| ASPH          | 0.861 | 3.20E-09 | up | KIT        | -1.055 | 2.84E-06 | down |
| SLA-DQB1      | 0.861 | 9.50E-03 | up | SORBS1     | -1.058 | 5.41E-08 | down |
| SYK-like      | 0.861 | 3.09E-03 | up | EFR3B      | -1.060 | 4.51E-07 | down |
| KPNA3         | 0.861 | 1.09E-04 | up | MYH14      | -1.063 | 1.02E-02 | down |
| MITD1         | 0.861 | 1.07E-02 | up | ZSWIM1     | -1.063 | 7.99E-03 | down |
| EPSTI1        | 0.861 | 9.27E-06 | up | HSD17B7    | -1.066 | 2.01E-03 | down |
| UHRF2         | 0.861 | 5.55E-04 | up | RTN4IP1    | -1.069 | 1.49E-03 | down |
| DBI           | 0.861 | 4.84E-03 | up | CHGB       | -1.071 | 1.15E-04 | down |
| OAZ3          | 0.861 | 2.85E-03 | up | CLIC6      | -1.072 | 3.87E-03 | down |
| GUCA1B        | 0.861 | 2.42E-03 | up | STX6       | -1.073 | 2.33E-05 | down |
| CENPT         | 0.850 | 2.32E-03 | up | CCM2       | -1.079 | 2.18E-16 | down |
| USP35         | 0.848 | 3.50E-03 | up | PDE4DIP    | -1.082 | 2.42E-03 | down |
| AURKB         | 0.843 | 4.31E-14 | up | NRP2       | -1.082 | 1.52E-06 | down |
| ERGIC2        | 0.838 | 4.08E-07 | up | MRPS21     | -1.087 | 4.97E-05 | down |
| FARSB         | 0.838 | 5.88E-09 | up | CCRN4L     | -1.087 | 2.23E-04 | down |
| SEMA3C        | 0.834 | 5.90E-04 | up | CDK8       | -1.096 | 3.69E-06 | down |
| ORC4          | 0.831 | 1.04E-03 | up | CD209      | -1.101 | 4.70E-03 | down |
| APLF          | 0.824 | 1.20E-02 | up | PPP2R5E    | -1.101 | 5.53E-05 | down |
| CCDC34        | 0.820 | 8.23E-03 | up | PGAP2      | -1.107 | 2.20E-03 | down |
| GRPEL2        | 0.820 | 7.36E-07 | up | PIGS       | -1.110 | 7.39E-04 | down |
| KLF16         | 0.816 | 2.48E-04 | up | LDB3       | -1.121 | 5.65E-04 | down |
| PHAX          | 0.816 | 1.16E-04 | up | EPT1       | -1.139 | 7.64E-03 | down |
| Mitochondrial | 0.815 | 2.30E-17 | up | TM9SF2     | -1.139 | 2.29E-07 | down |
| KCNAB2        | 0.814 | 4.97E-03 | up | SMIM13     | -1.139 | 9.55E-03 | down |
| FKBP14        | 0.813 | 2.12E-04 | up | ACTN3      | -1.144 | 3.35E-05 | down |
| TMEM87A       | 0.813 | 4.26E-04 | up | CALN1      | -1.156 | 1.15E-03 | down |
| PRKAR1B       | 0.810 | 8.12E-03 | up | CPSF4      | -1.171 | 5.76E-07 | down |
| NPM3          | 0.809 | 1.62E-24 | up | SLIT3      | -1.180 | 1.36E-03 | down |
| LSM5          | 0.809 | 3.38E-04 | up | RNF8       | -1.185 | 2.98E-03 | down |
| TONSL         | 0.805 | 4.45E-04 | up | RN5-8S     | -1.190 | 0.00E+00 | down |
| TMEM177       | 0.804 | 2.12E-03 | up | GRAMD3     | -1.190 | 2.08E-04 | down |
| CDCA4         | 0.803 | 2.65E-03 | up | ABI1       | -1.191 | 5.11E-03 | down |
| ARHGEF25      | 0.803 | 3.09E-04 | up | YLPM1      | -1.198 | 5.32E-04 | down |
| SDAD1         | 0.803 | 2.82E-04 | up | DENND5B    | -1.200 | 9.65E-03 | down |

|            |       |          |    |               |        |          |      |
|------------|-------|----------|----|---------------|--------|----------|------|
| CCL20      | 0.801 | 8.15E-16 | up | H/ACA1-like   | -1.213 | 7.84E-04 | down |
| RCOR2      | 0.801 | 8.82E-03 | up | CRISPLD1      | -1.213 | 2.38E-06 | down |
| GINS4      | 0.800 | 4.56E-04 | up | UBL3          | -1.224 | 3.72E-03 | down |
| CDK14      | 0.800 | 6.90E-04 | up | SIRPB1        | -1.249 | 2.53E-04 | down |
| FOXS1      | 0.798 | 1.08E-02 | up | SELP          | -1.261 | 3.89E-06 | down |
| DHX58      | 0.797 | 1.22E-25 | up | IGF2R         | -1.269 | 2.72E-09 | down |
| MX1        | 0.796 | 5.78E-15 | up | FHIT          | -1.276 | 1.06E-02 | down |
| PTEN       | 0.795 | 5.55E-03 | up | SLC25A23      | -1.276 | 1.82E-05 | down |
| ATXN3      | 0.793 | 8.67E-07 | up | HSPD1         | -1.288 | 9.73E-03 | down |
| PRIM2      | 0.792 | 1.13E-06 | up | DFNB31        | -1.297 | 2.52E-03 | down |
| TTF1       | 0.790 | 8.00E-03 | up | ASB2          | -1.313 | 6.13E-04 | down |
| KIFC1      | 0.788 | 1.27E-03 | up | CCDC40        | -1.316 | 3.09E-03 | down |
| CCDC153    | 0.787 | 5.17E-03 | up | GLIPR2        | -1.317 | 2.43E-17 | down |
| KCTD13     | 0.783 | 5.11E-04 | up | NDRG4         | -1.336 | 1.09E-07 | down |
| ZC3H3      | 0.782 | 1.22E-02 | up | FAM227B       | -1.341 | 5.95E-03 | down |
| RAD21      | 0.780 | 2.22E-03 | up | BTD           | -1.345 | 5.78E-03 | down |
| BL3-7-like | 0.779 | 9.05E-03 | up | IGFBP5        | -1.347 | 3.03E-23 | down |
| CDC20      | 0.778 | 1.11E-24 | up | NOS1AP        | -1.361 | 1.20E-03 | down |
| BATF2      | 0.777 | 4.47E-03 | up | HEPHL1        | -1.376 | 2.58E-20 | down |
| LMAN2L     | 0.777 | 5.21E-04 | up | MMP9          | -1.378 | 2.51E-08 | down |
| NEK2       | 0.776 | 1.13E-03 | up | CAPZA2        | -1.380 | 8.93E-07 | down |
| POMC       | 0.776 | 2.04E-03 | up | SPG21         | -1.382 | 2.49E-20 | down |
| RHCG       | 0.776 | 1.48E-06 | up | GPR133        | -1.390 | 4.80E-03 | down |
| UBE2D3     | 0.774 | 1.57E-12 | up | IDI1          | -1.399 | 3.44E-06 | down |
| TMEM106A   | 0.772 | 5.48E-07 | up | AHSA1         | -1.408 | 4.95E-16 | down |
| PPP3CA     | 0.770 | 3.54E-03 | up | CYP4F3        | -1.415 | 8.85E-13 | down |
| PRRT3      | 0.766 | 5.25E-05 | up | HDC           | -1.417 | 7.08E-18 | down |
| PSMD3      | 0.765 | 9.18E-09 | up | DAPK1         | -1.419 | 9.12E-04 | down |
| MRP1       | 0.765 | 9.85E-03 | up | RECK          | -1.419 | 1.17E-02 | down |
| EEF1E1     | 0.765 | 4.05E-05 | up | PTGIR         | -1.419 | 1.14E-03 | down |
| RAB30      | 0.765 | 9.25E-04 | up | ZNRD1         | -1.439 | 3.71E-18 | down |
| UBE2S      | 0.764 | 8.08E-03 | up | KCTD3         | -1.455 | 2.06E-10 | down |
| UBE2T      | 0.763 | 3.81E-13 | up | POPDC2        | -1.470 | 9.37E-04 | down |
| MKI67      | 0.761 | 8.08E-05 | up | SLC6A6        | -1.482 | 3.49E-08 | down |
| FAM174A    | 0.761 | 7.89E-04 | up | FBLN7         | -1.491 | 2.02E-06 | down |
| TGFB1      | 0.757 | 4.81E-10 | up | Arylsulfatase | -1.500 | 1.02E-18 | down |
| NUSAP1     | 0.756 | 1.98E-05 | up | AGT           | -1.512 | 1.43E-08 | down |
| NFKBID     | 0.756 | 8.14E-03 | up | FAM71F1       | -1.527 | 1.96E-04 | down |
| CDH24      | 0.755 | 3.23E-03 | up | HIST1H2BD     | -1.554 | 2.55E-05 | down |
| DDX46      | 0.754 | 8.76E-03 | up | SLC29A4       | -1.554 | 1.16E-02 | down |

|              |       |          |    |               |        |          |      |
|--------------|-------|----------|----|---------------|--------|----------|------|
| PHKA1        | 0.754 | 2.71E-04 | up | SOX13         | -1.554 | 1.24E-02 | down |
| MRPS22       | 0.754 | 4.34E-07 | up | RPE           | -1.559 | 3.86E-07 | down |
| FUOM         | 0.754 | 2.46E-06 | up | SAG           | -1.598 | 6.13E-03 | down |
| ADAMTS5      | 0.753 | 2.35E-03 | up | PELP1         | -1.631 | 2.39E-07 | down |
| POLA2        | 0.752 | 2.58E-09 | up | PAFAH1B3      | -1.644 | 3.35E-06 | down |
| GPALPP1      | 0.752 | 1.56E-03 | up | RPA3          | -1.654 | 7.41E-03 | down |
| KIF22        | 0.750 | 4.44E-08 | up | DIABLO        | -1.669 | 6.94E-22 | down |
| AP3S1        | 0.746 | 1.30E-03 | up | Sarcoglycan-L | -1.669 | 8.14E-06 | down |
| SYNE3        | 0.741 | 1.05E-02 | up | PLEKHG2       | -1.673 | 5.80E-05 | down |
| IPO11        | 0.739 | 5.95E-03 | up | ZFYVE28       | -1.673 | 7.82E-03 | down |
| HAUS8        | 0.737 | 3.86E-03 | up | NFYA          | -1.677 | 1.21E-02 | down |
| CDC45        | 0.734 | 2.65E-06 | up | DVL2          | -1.683 | 1.46E-04 | down |
| KLF2         | 0.731 | 6.68E-04 | up | TGFBR2        | -1.690 | 2.31E-13 | down |
| LCMT1        | 0.731 | 3.37E-12 | up | RPL18         | -1.693 | 0.00E+00 | down |
| MED6         | 0.729 | 2.37E-06 | up | CCDC30        | -1.698 | 7.80E-03 | down |
| GINS3        | 0.728 | 2.19E-03 | up | CCL23         | -1.724 | 2.68E-03 | down |
| ASF1B        | 0.725 | 3.01E-06 | up | R-spondin3-L  | -1.724 | 9.63E-03 | down |
| ADAMTS4      | 0.723 | 9.06E-03 | up | PI4K2B        | -1.724 | 2.44E-04 | down |
| PRR5-ARHGAP8 | 0.718 | 5.99E-04 | up | SLC25A35      | -1.724 | 5.08E-03 | down |
| UBAP1        | 0.718 | 3.22E-07 | up | RUNX2         | -1.737 | 2.13E-04 | down |
| KIF20A       | 0.717 | 1.03E-10 | up | CYP27A1       | -1.775 | 5.69E-16 | down |
| B9D2         | 0.716 | 7.56E-10 | up | PDGFB         | -1.779 | 1.28E-08 | down |
| IFIT5        | 0.715 | 6.84E-04 | up | FAT4          | -1.791 | 2.54E-03 | down |
| CGREF1       | 0.715 | 9.79E-09 | up | UBR5-like     | -1.802 | 1.58E-04 | down |
| GBP1         | 0.713 | 1.73E-04 | up | ITIH4         | -1.802 | 8.85E-05 | down |
| MTG1         | 0.710 | 3.82E-06 | up | CTRB2         | -1.837 | 5.65E-13 | down |
| CCDC59       | 0.709 | 2.91E-05 | up | TSC1          | -1.855 | 2.45E-03 | down |
| PPIC         | 0.709 | 2.80E-09 | up | CELA2A        | -1.859 | 3.10E-07 | down |
| TBCK         | 0.709 | 7.98E-03 | up | CD79A         | -1.905 | 9.19E-03 | down |
| MYBL2        | 0.703 | 1.15E-16 | up | HBE1          | -1.946 | 1.09E-02 | down |
| BRIX1        | 0.702 | 4.84E-05 | up | HLA-DQA1      | -1.946 | 1.62E-03 | down |
| SLC29A1      | 0.702 | 7.14E-07 | up | SLC35G2       | -1.969 | 3.11E-03 | down |
| ARL3         | 0.701 | 6.65E-20 | up | R3HDM2        | -1.991 | 1.84E-09 | down |
| PSMB8        | 0.699 | 1.12E-20 | up | ATG2B         | -1.991 | 2.58E-05 | down |
| USP18        | 0.695 | 7.66E-12 | up | FEZ1          | -2.013 | 1.73E-03 | down |
| PARP9        | 0.693 | 4.50E-04 | up | RAET1E        | -2.013 | 1.20E-02 | down |
| SHROOM1      | 0.693 | 3.08E-04 | up | ZMYND12       | -2.065 | 9.36E-03 | down |
| HAX1         | 0.690 | 2.33E-05 | up | FAM188B       | -2.109 | 4.38E-08 | down |
| GNAI1        | 0.689 | 3.99E-03 | up | CDH4          | -2.125 | 9.19E-06 | down |
| MACROD1      | 0.689 | 1.65E-06 | up | ATG5          | -2.139 | 6.26E-05 | down |

|           |       |          |    |            |        |          |      |
|-----------|-------|----------|----|------------|--------|----------|------|
| RUSF1     | 0.686 | 1.02E-03 | up | CCL4       | -2.139 | 8.01E-03 | down |
| EMC10     | 0.685 | 1.24E-18 | up | TFB2M      | -2.139 | 7.31E-04 | down |
| CENPW     | 0.682 | 2.34E-03 | up | LTC4S      | -2.139 | 2.17E-03 | down |
| PLEKHG5   | 0.682 | 6.13E-03 | up | PIGT       | -2.176 | 2.03E-29 | down |
| STAT5A    | 0.681 | 1.85E-07 | up | CCDC148    | -2.309 | 7.66E-03 | down |
| AVEN      | 0.680 | 2.26E-03 | up | GDF1       | -2.309 | 8.64E-03 | down |
| DNAL4     | 0.679 | 1.53E-05 | up | CASP8      | -2.332 | 7.72E-04 | down |
| HMGB1     | 0.678 | 9.16E-15 | up | RSU1       | -2.347 | 1.66E-02 | down |
| MRPS18A   | 0.673 | 4.32E-03 | up | HCN1       | -2.361 | 8.37E-05 | down |
| NFRKB     | 0.673 | 5.75E-05 | up | RAB3IP     | -2.387 | 1.20E-02 | down |
| APOL3     | 0.671 | 3.48E-09 | up | ENY2       | -2.418 | 1.21E-19 | down |
| CRBN      | 0.668 | 1.59E-05 | up | VAC14      | -2.487 | 2.98E-26 | down |
| UBR5      | 0.668 | 1.50E-04 | up | MDH1       | -2.521 | 1.41E-25 | down |
| GOLM2     | 0.668 | 1.36E-03 | up | PKLR       | -2.554 | 4.18E-03 | down |
| PAK4-like | 0.664 | 7.08E-05 | up | RYBP       | -2.554 | 9.18E-11 | down |
| LTA4H     | 0.663 | 2.24E-04 | up | C3orf33    | -2.554 | 9.96E-03 | down |
| LRRC73    | 0.663 | 7.98E-04 | up | CEP44      | -2.598 | 1.63E-06 | down |
| NAT1      | 0.662 | 1.91E-03 | up | PDZ-like   | -2.598 | 1.16E-07 | down |
| GNL1      | 0.662 | 1.42E-20 | up | SGCD       | -2.598 | 1.04E-04 | down |
| PDSS1     | 0.661 | 8.08E-03 | up | ATXN7L3B   | -2.613 | 9.83E-12 | down |
| LANCL1    | 0.660 | 3.61E-05 | up | WDR70      | -2.624 | 2.41E-10 | down |
| MCM4      | 0.660 | 4.23E-15 | up | TCEAL4     | -2.641 | 5.49E-03 | down |
| MCTS1     | 0.656 | 1.46E-10 | up | GPR98      | -2.641 | 1.78E-04 | down |
| PTPN12    | 0.655 | 6.17E-03 | up | SPON1      | -2.641 | 2.00E-04 | down |
| BCS1L     | 0.655 | 6.94E-04 | up | TMEM181    | -2.702 | 1.45E-21 | down |
| MTO1      | 0.653 | 3.63E-04 | up | GATB       | -2.724 | 1.22E-07 | down |
| UQCRB     | 0.652 | 1.11E-17 | up | FBXL2      | -2.724 | 1.06E-02 | down |
| PEX11G    | 0.651 | 2.46E-03 | up | LRBA       | -2.724 | 1.05E-02 | down |
| VAX2      | 0.650 | 3.00E-05 | up | MYOZ2      | -2.724 | 8.28E-04 | down |
| MRPL47    | 0.648 | 1.90E-03 | up | SLIT-ROBO2 | -2.724 | 7.46E-03 | down |
| ADK       | 0.646 | 2.17E-03 | up | AKAP5      | -2.771 | 2.81E-03 | down |
| IFI44     | 0.646 | 5.93E-09 | up | FGT10-like | -2.861 | 8.10E-04 | down |
| PUSL1     | 0.646 | 1.12E-03 | up | POLR3B     | -2.868 | 1.40E-17 | down |
| EMP2      | 0.644 | 2.09E-03 | up | FBXO33     | -2.905 | 3.61E-03 | down |
| RBIS      | 0.642 | 4.38E-06 | up | TRIM5      | -2.923 | 9.33E-14 | down |
| SHMT2     | 0.635 | 1.59E-27 | up | DOCK2      | -2.946 | 2.46E-03 | down |
| BIK       | 0.634 | 2.04E-04 | up | TBX22      | -2.946 | 7.44E-06 | down |
| HNRNPH3   | 0.633 | 7.70E-03 | up | NEK11      | -3.046 | 3.25E-05 | down |
| TRNT1     | 0.632 | 2.25E-03 | up | RGN        | -3.046 | 8.31E-03 | down |
| HJURP     | 0.630 | 1.00E-02 | up | PERP       | -3.059 | 1.73E-03 | down |

|         |       |          |    |            |        |          |      |
|---------|-------|----------|----|------------|--------|----------|------|
| NSMCE1  | 0.630 | 1.76E-03 | up | CEMIP      | -3.073 | 0.00E+00 | down |
| N4BP2L2 | 0.630 | 2.77E-03 | up | NOV        | -3.093 | 1.19E-03 | down |
| HAUS2   | 0.630 | 4.74E-03 | up | USP40      | -3.309 | 3.22E-03 | down |
| ADSS    | 0.628 | 1.25E-03 | up | ITGA9      | -3.309 | 3.50E-04 | down |
| TSC22D4 | 0.627 | 6.97E-04 | up | FBXW2      | -3.416 | 1.84E-20 | down |
| DPM1    | 0.625 | 1.80E-06 | up | RAD51C     | -3.461 | 4.51E-05 | down |
| IMPA2   | 0.624 | 6.26E-03 | up | CUX1       | -3.481 | 3.74E-22 | down |
| C7orf50 | 0.621 | 1.15E-13 | up | ST6GALNAC3 | -3.724 | 1.91E-04 | down |
| PCNA    | 0.620 | 3.13E-09 | up | NEURL4     | -3.763 | 5.66E-07 | down |
| BCAS4   | 0.619 | 2.81E-24 | up | TMEM192    | -3.783 | 3.71E-09 | down |
| U2AF1   | 0.618 | 2.17E-07 | up | SLC11A1    | -3.946 | 2.06E-09 | down |
| FUT4    | 0.618 | 5.70E-03 | up | TSPAN7     | -4.046 | 1.42E-05 | down |
| FAM64A  | 0.616 | 1.25E-05 | up | PAF1       | -4.209 | 3.87E-19 | down |
| MMACHC  | 0.616 | 5.10E-03 | up | CPB1       | -4.226 | 3.28E-15 | down |
| MFSD2A  | 0.613 | 3.17E-04 | up | CPA1       | -5.648 | 2.08E-28 | down |
| USMG5   | 0.612 | 2.18E-12 | up | CTRB1      | -7.598 | 1.26E-23 | down |

**Table S2.** GO enrichment analysis of DE mRNAs after SMAD4 inhibition

| Category | Term ID    | GO Terms                                                    | Count | P-value <sup>1</sup> | Fold Enrichment |
|----------|------------|-------------------------------------------------------------|-------|----------------------|-----------------|
| GO_BP    | GO:0006955 | Immune response                                             | 20    | 7.31E-04             | 2.382329519     |
| GO_BP    | GO:0008284 | Regulation of cell proliferation                            | 15    | 2.75E-02             | 1.891849912     |
| GO_BP    | GO:0006954 | Inflammatory response                                       | 15    | 2.75E-02             | 1.891849912     |
| GO_BP    | GO:0043066 | Regulation of apoptosis                                     | 15    | 3.88E-02             | 1.804979253     |
| GO_BP    | GO:0045893 | Regulation of transcription                                 | 15    | 3.88E-02             | 1.804979253     |
| GO_BP    | GO:0008360 | Regulation of cell shape                                    | 12    | 4.78E-03             | 2.695435685     |
| GO_BP    | GO:0051607 | Defense response to virus                                   | 12    | 9.98E-03             | 2.439834025     |
| GO_BP    | GO:0006468 | Protein phosphorylation                                     | 11    | 1.75E-03             | 3.283996008     |
| GO_BP    | GO:0070374 | Positive regulation of ERK1 and ERK2 cascade                | 11    | 1.93E-03             | 3.242946058     |
| GO_BP    | GO:0010628 | Positive regulation of gene expression                      | 11    | 2.13E-02             | 2.295891015     |
| GO_BP    | GO:0007155 | Cell adhesion                                               | 11    | 4.09E-02             | 2.05901337      |
| GO_BP    | GO:0030198 | Extracellular matrix organization                           | 10    | 1.10E-04             | 5.127187444     |
| GO_BP    | GO:0051301 | Cell division                                               | 9     | 7.11E-04             | 4.516288514     |
| GO_BP    | GO:0060326 | Cell chemotaxis                                             | 9     | 1.60E-03             | 4.005010569     |
| GO_BP    | GO:0016567 | Protein ubiquitination                                      | 9     | 3.85E-02             | 2.332588573     |
| GO_BP    | GO:0030308 | Negative regulation of cell growth                          | 8     | 3.00E-02             | 2.657471802     |
| GO_BP    | GO:0045071 | Negative regulation of viral genome replication             | 7     | 3.03E-04             | 7.178062421     |
| GO_BP    | GO:0070098 | Chemokine-mediated signaling pathway                        | 7     | 4.23E-03             | 4.462038802     |
| GO_BP    | GO:0007067 | Mitotic nuclear division                                    | 7     | 8.97E-03             | 3.839428737     |
| GO_BP    | GO:0007010 | Cytoskeleton organization                                   | 7     | 1.83E-02             | 3.301908714     |
| GO_BP    | GO:0051091 | DNA binding transcription factor activity                   | 7     | 2.00E-02             | 3.237165406     |
| GO_BP    | GO:0043547 | Positive regulation of GTPase activity                      | 7     | 2.80E-02             | 3.001735194     |
| GO_BP    | GO:0071347 | Cellular response to interleukin-1                          | 6     | 9.08E-03             | 4.564850756     |
| GO_BP    | GO:0007179 | Positive regulation TGF- $\beta$ receptor signaling pathway | 6     | 1.51E-02             | 4.043153527     |
| GO_BP    | GO:0009615 | Response to virus                                           | 6     | 1.89E-02             | 3.824604688     |
| GO_BP    | GO:0007059 | Chromosome segregation                                      | 6     | 2.11E-02             | 3.723957196     |
| GO_BP    | GO:0071356 | cellular response to tumor necrosis factor                  | 6     | 2.84E-02             | 3.451472523     |
| GO_BP    | GO:0007018 | Microtubule-based movement                                  | 6     | 4.04E-02             | 3.144674965     |
| GO_BP    | GO:0007015 | Actin filament organization                                 | 6     | 4.38E-02             | 3.076312466     |
| GO_BP    | GO:0006270 | DNA replication initiation                                  | 5     | 4.85E-03             | 6.936783012     |
| GO_BP    | GO:0048247 | Lymphocyte chemotaxis                                       | 5     | 7.39E-03             | 6.206595326     |
| GO_BP    | GO:0034644 | Cellular response to UV                                     | 5     | 1.26E-02             | 5.360241418     |
| GO_BP    | GO:0002548 | Monocyte chemotaxis                                         | 5     | 1.72E-02             | 4.913554633     |
| GO_BP    | GO:0043491 | Protein kinase B signaling                                  | 5     | 1.72E-02             | 4.913554633     |
| GO_BP    | GO:0007173 | Epidermal growth factor receptor signaling pathway          | 5     | 2.57E-02             | 4.367604119     |
| GO_BP    | GO:0071346 | Cellular response to interferon-gamma                       | 5     | 2.90E-02             | 4.211618257     |
| GO_BP    | GO:0034446 | Substrate adhesion-dependent cell spreading                 | 5     | 2.90E-02             | 4.211618257     |
| GO_BP    | GO:0001503 | Ossification                                                | 5     | 3.25E-02             | 4.066390041     |
| GO_BP    | GO:0002474 | Antigen processing and presentation of peptide antigen      | 4     | 1.24E-02             | 7.861687414     |

|       |            |                                                      |     |          |             |
|-------|------------|------------------------------------------------------|-----|----------|-------------|
| GO_BP | GO:0030511 | TGF-beta receptor signaling pathway                  | 4   | 1.57E-02 | 7.256942228 |
| GO_BP | GO:0000070 | Mitotic sister chromatid segregation                 | 4   | 1.93E-02 | 6.738589212 |
| GO_BP | GO:0043392 | Negative regulation of DNA binding                   | 4   | 1.93E-02 | 6.738589212 |
| GO_BP | GO:0090026 | Positive regulation of monocyte chemotaxis           | 4   | 2.34E-02 | 6.289349931 |
| GO_BP | GO:0060267 | Positive regulation of respiratory burst             | 3   | 1.01E-02 | 17.68879668 |
| GO_BP | GO:0032727 | Positive regulation of interferon-alpha production   | 3   | 1.64E-02 | 14.15103734 |
| GO_BP | GO:0000212 | Meiotic spindle organization                         | 3   | 2.39E-02 | 11.79253112 |
| GO_BP | GO:0010642 | Platelet-derived growth factor receptor pathway      | 3   | 2.39E-02 | 11.79253112 |
| GO_BP | GO:0043304 | Regulation of mast cell degranulation                | 3   | 2.39E-02 | 11.79253112 |
| GO_BP | GO:0035457 | Cellular response to interferon-alpha                | 3   | 2.39E-02 | 11.79253112 |
| GO_BP | GO:0051382 | Kinetochore assembly                                 | 3   | 3.26E-02 | 10.10788382 |
| GO_BP | GO:0032967 | Positive regulation of collagen biosynthetic process | 3   | 3.26E-02 | 10.10788382 |
| GO_BP | GO:0033627 | Cell adhesion mediated by integrin                   | 3   | 3.26E-02 | 10.10788382 |
| GO_BP | GO:0019370 | Leukotriene biosynthetic process                     | 3   | 4.22E-02 | 8.84439834  |
| <hr/> |            |                                                      |     |          |             |
| GO_CC | GO:0005737 | Cytoplasm                                            | 120 | 5.03E-04 | 1.334442509 |
| GO_CC | GO:0005634 | Nucleus                                              | 104 | 4.18E-02 | 1.183553733 |
| GO_CC | GO:0005615 | Extracellular space                                  | 52  | 5.95E-04 | 1.627774688 |
| GO_CC | GO:0005739 | Mitochondrion                                        | 42  | 1.59E-02 | 1.441485919 |
| GO_CC | GO:0005576 | Extracellular region                                 | 27  | 2.16E-02 | 1.582396354 |
| GO_CC | GO:0005813 | Centrosome                                           | 23  | 6.33E-04 | 2.239276231 |
| GO_CC | GO:0009986 | Cell surface                                         | 20  | 1.19E-02 | 1.856277031 |
| GO_CC | GO:0005578 | Proteinaceous extracellular matrix                   | 16  | 8.85E-04 | 2.687679983 |
| GO_CC | GO:0005911 | Cell-cell junction                                   | 11  | 7.28E-03 | 2.704997509 |
| GO_CC | GO:0030496 | Midbody                                              | 10  | 1.62E-03 | 3.614115129 |
| GO_CC | GO:0005856 | Cytoskeleton                                         | 9   | 2.56E-02 | 2.52562869  |
| GO_CC | GO:0000776 | Kinetochore                                          | 8   | 7.45E-04 | 5.157439968 |
| GO_CC | GO:0005876 | Spindle microtubule                                  | 7   | 5.87E-04 | 6.422004575 |
| GO_CC | GO:0072686 | Mitotic spindle                                      | 6   | 3.34E-03 | 5.724758364 |
| GO_CC | GO:0005871 | Kinesin complex                                      | 6   | 2.02E-02 | 3.766288398 |
| GO_CC | GO:0005604 | Basement membrane                                    | 5   | 3.14E-02 | 4.112613767 |
| GO_CC | GO:0019005 | SCF ubiquitin ligase complex                         | 5   | 3.90E-02 | 3.847283847 |
| GO_CC | GO:0042612 | MHC class I protein complex                          | 4   | 9.35E-03 | 8.67387631  |
| <hr/> |            |                                                      |     |          |             |
| GO_MF | GO:0005524 | ATP binding                                          | 54  | 3.09E-02 | 1.31310748  |
| GO_MF | GO:0003682 | Chromatin binding                                    | 19  | 8.06E-03 | 1.967052121 |
| GO_MF | GO:0005525 | GTP binding                                          | 19  | 4.01E-02 | 1.648644403 |
| GO_MF | GO:0008201 | Heparin binding                                      | 10  | 6.60E-03 | 2.941740334 |
| GO_MF | GO:0008009 | Protein kinase binding                               | 7   | 2.43E-03 | 4.966349859 |
| GO_MF | GO:0050840 | Chemokine activity                                   | 6   | 6.49E-04 | 8.040756914 |
| GO_MF | GO:0003725 | Double-stranded RNA binding                          | 6   | 2.37E-02 | 3.618340611 |
| GO_MF | GO:0048020 | CCR chemokine receptor binding                       | 5   | 5.57E-03 | 6.700630762 |
| GO_MF | GO:0019901 | Extracellular matrix binding                         | 5   | 1.17E-02 | 5.48233426  |
| GO_MF | GO:0005518 | Collagen binding                                     | 4   | 9.05E-03 | 8.771734815 |

|       |            |                               |   |          |             |
|-------|------------|-------------------------------|---|----------|-------------|
| GO_MF | GO:0001530 | Lipopolysaccharide binding    | 4 | 2.21E-02 | 6.432605531 |
| GO_MF | GO:0000400 | Four-way junction DNA binding | 4 | 2.21E-02 | 6.432605531 |

---

<sup>1</sup>GO terms with  $P$ -value  $< 0.05$  were considered as significant functional processes of DEmRNAs.

**Table S3.** KEGG pathway analysis of DEmRNAs after SMAD4 inhibition

| <b>Term ID</b> | <b>KEGG Terms</b>                       | <b>Count</b> | <b>Percentage %</b> | <b>P-value<sup>1</sup></b> | <b>Fold.<br/>Enrichment</b> |
|----------------|-----------------------------------------|--------------|---------------------|----------------------------|-----------------------------|
| ssc05200       | Pathways in cancer                      | 29           | 3.761348898         | 3.50E-03                   | 1.768298843                 |
| ssc04068       | FoxO signaling pathway                  | 11           | 1.426718547         | 4.66E-02                   | 1.936555435                 |
| ssc04145       | Phagosome                               | 12           | 1.556420233         | 4.09E-02                   | 1.964871249                 |
| ssc05202       | Transcriptional misregulation in cancer | 13           | 1.68612192          | 2.83E-02                   | 2.002574371                 |
| ssc04114       | Oocyte meiosis                          | 10           | 1.297016861         | 4.21E-02                   | 2.148139057                 |
| ssc04512       | ECM-receptor interaction                | 9            | 1.167315175         | 2.13E-02                   | 2.60163508                  |
| ssc04623       | Cytosolic DNA-sensing pathway           | 7            | 0.907911803         | 4.42E-02                   | 2.686934591                 |
| ssc04115       | p53 signaling pathway                   | 9            | 1.167315175         | 1.10E-02                   | 2.926839465                 |
| ssc03050       | Proteasome                              | 6            | 0.778210117         | 4.11E-02                   | 3.121962096                 |
| ssc04350       | TGF-beta signaling pathway              | 11           | 1.426718547         | 1.46E-03                   | 3.344959388                 |
| ssc04612       | Antigen processing and presentation     | 10           | 1.297016861         | 1.77E-03                   | 3.5476842                   |
| ssc04110       | Cell cycle                              | 22           | 2.853437095         | 1.13E-08                   | 4.47933692                  |
| ssc03030       | DNA replication                         | 7            | 0.907911803         | 3.23E-03                   | 4.682943144                 |

<sup>1</sup>P-value < 0.05 was considered as a cut-off criteria to identify significantly enriched pathways.

**Table S4.** The primers used for qRT-PCR in this study

| Gene name     | Primer  | Primer sequences (5'-3') | Product size (bp) |
|---------------|---------|--------------------------|-------------------|
| <i>ACVR1B</i> | Forward | CATCCTTGGCTTCATTGCTG     | 125               |
|               | Reverse | CGATGGTCACCGTGTAGCG      |                   |
| <i>BMPR2</i>  | Forward | GATAGTTGCCTTATGCTTTGGAT  | 191               |
|               | Reverse | CAACTGGACGTTTCATCTAAGGA  |                   |
| <i>TGFBR2</i> | Forward | TGGCTCCTGAAGTCCTAGAGT    | 154               |
|               | Reverse | GAACCAAAGGGTGGCTCAT      |                   |
| <i>SMAD4</i>  | Forward | AGAGCGTCAACCGGGAGATG     | 250               |
|               | Reverse | CAGCCAGGAGAAATCAAACAGG   |                   |
| <i>c-JUN</i>  | Forward | CCTTCTACGACGATGCCCTCA    | 110               |
|               | Reverse | GTCAGCCAGGTTTCAGGGTCAT   |                   |
| <i>SP1</i>    | Forward | AAGCAACGCCATTGTCAGG      | 385               |
|               | Reverse | ACCTGGATTCCCGAAGCAC      |                   |
| <i>CREB1</i>  | Forward | ATTGCCACATTAGCCCAGGTA    | 363               |
|               | Reverse | CTCTTCAATCCTTGGCACTCC    |                   |
| <i>GAPDH</i>  | Forward | GATGGTGAAGGTCGGAGTG      | 220               |
|               | Reverse | CGAAGTTGTCATGGATGACC     |                   |

**Table S5.** The siRNAs used in this study

| siRNA              |            | Sequence (5' to 3')       | Source        |
|--------------------|------------|---------------------------|---------------|
| NC-siRNA<br>(siNC) | Sense      | UUCUCCGAACGUGUCACGUTT     | In this study |
|                    | Anti-sense | ACGUGACACGUUCGGAGAATT     |               |
| siSMAD4            | Sense      | CACCAGGAAUUGAUCUCUCAGGAUU | In this study |
|                    | Anti-sense | AAUCCUGAGAGAUCAAUCCUGGUG  |               |
| siCREB1-1          | Sense      | GCCCAGCAACCAAGUUGUUTT     | In this study |
|                    | Anti-sense | AACAACUUGGTTGCUGGGCTT     |               |
| siCREB1-2          | Sense      | GCAGACAGUUCAAGUCCAUTT     | In this study |
|                    | Anti-sense | AUGGACUUGAACUGUCUGCTT     |               |
| siCREB1-3          | Sense      | GCAACAUCAUCUGCUCUCCATT    | In this study |
|                    | Anti-sense | UGGGAGCAGAUGAUGUUGCTT     |               |
| siSP1-1            | Sense      | GCAACAUCAUUGCUGCUAUTT     | In this study |
|                    | Anti-sense | AUAGCAGCAAUGAUGUUGCTT     |               |
| siSP1-2            | Sense      | GGGAAACGCUUCACACGUUTT     | In this study |
|                    | Anti-sense | AACGUGUGAAGCGUUUCCCTT     |               |
| siSP1-3            | Sense      | GCCAUCAGUUCUGCCAGUUTT     | In this study |
|                    | Anti-sense | AACUGGCAGAACUGAUGGCTT     |               |
